# Supplementary material for: Spatiotemporal Assembly of Bacterial and Fungal Communities of Seed-Seedling-Adult in Rice
Source: Front Microbiol. 2021 Aug 5;12:708475. doi: 10.3389/fmicb.2021.708475 (PMC8375405; doi:10.3389/fmicb.2021.708475)
Supplement: Supplementary file 5 [file Data_Sheet_5.XLSX]

## Sheet: Content
Supplementary Table 4. Statistical analyses on Jaccard distance between microbial communities of seeds at the sowing stage and seedlings
Sheet	Content
Jaccard distance-value	Jaccard distance estimated by pairwise comparison
Bacteria	Statistical analyses on Jaccard distance between bacterial communities of seeds at the sowing stage and seedlings
Fungi	Statistical analyses on Jaccard distance between fungal communities of seeds at the sowing stage and seedlings

## Sheet: Jaccard distance-value
Bacteria
Hulled condition					Unhulled condition					Summary table
Var1	Var2	Jaccard distance	Comparison		Var1	Var2	Jaccard distance	Comparison		Kingdom	Condition	Comparison	Mean distance	Standard deviation
H0G1.17	H1G1.17	0.618049	Seed & 1-day-old germinating seed		U0G1.17	U1G1.17	0.543647	Seed & 1-day-old germinating seed		Bacteria	Hulled	Seed & 1-day-old germinating seed	0.668319	0.0781355
H0G2.17	H1G1.17	0.679351			U0G2.17	U1G1.17	0.531283					Seed & 4-day-old germinating seed	0.794304	0.0545834
H0G3.17	H1G1.17	0.562338			U0G3.17	U1G1.17	0.567418					Seed & shoot of 7-day-old seedling	0.87025	0.0500463
H0G1.17	H1G2.17	0.648309			U0G1.17	U1G2.17	0.645387					Seed & root of 7-day-old seedling	0.809258	0.0281964
H0G2.17	H1G2.17	0.603544			U0G2.17	U1G2.17	0.514248					Seed & leaf of 14-day-old seedling	0.899261	0.0290469
H0G3.17	H1G2.17	0.628592			U0G3.17	U1G2.17	0.536439					Seed & stem of 14-day-old seedling	0.914651	0.0260393
H0G1.17	H1G3.17	0.737366			U0G1.17	U1G3.17	0.61416					Seed & root of 14-day-old seedling	0.73518	0.0259609
H0G2.17	H1G3.17	0.724609			U0G2.17	U1G3.17	0.440103				Unhulled	Seed & 1-day-old germinating seed	0.5463	0.0591616
H0G3.17	H1G3.17	0.812715			U0G3.17	U1G3.17	0.524011					Seed & 4-day-old germinating seed	0.588703	0.0579246
H0G1.17	H4G1.17	0.798168	Seed & 4-day-old germinating seed		U0G1.17	U4G1.17	0.521997	Seed & 4-day-old germinating seed				Seed & shoot of 7-day-old seedling	0.903253	0.0598996
H0G2.17	H4G1.17	0.80865			U0G2.17	U4G1.17	0.565323					Seed & root of 7-day-old seedling	0.694085	0.0598596
H0G3.17	H4G1.17	0.853344			U0G3.17	U4G1.17	0.566425					Seed & leaf of 14-day-old seedling	0.856476	0.022104
H0G1.17	H4G2.17	0.750035			U0G1.17	U4G2.17	0.565711					Seed & stem of 14-day-old seedling	0.762994	0.0498331
H0G2.17	H4G2.17	0.682351			U0G2.17	U4G2.17	0.534136					Seed & root of 14-day-old seedling	0.719043	0.052702
H0G3.17	H4G2.17	0.820915			U0G3.17	U4G2.17	0.555238			Fungi	Hulled	Seed & 1-day-old germinating seed	0.831989	0.0843579
H0G1.17	H4G3.17	0.847858			U0G1.17	U4G3.17	0.658364					Seed & 4-day-old germinating seed	0.816917	0.0733588
H0G2.17	H4G3.17	0.761627			U0G2.17	U4G3.17	0.670826					Seed & shoot of 7-day-old seedling	0.92474	0.0194911
H0G3.17	H4G3.17	0.825785			U0G3.17	U4G3.17	0.660303					Seed & root of 7-day-old seedling	0.867307	0.0362314
H0G1.17	H7Sh1.17	0.902407	Seed & shoot of 7-day-old seedling		U0G1.17	U7Sh1.17	0.907025	Seed & shoot of 7-day-old seedling				Seed & leaf of 14-day-old seedling	0.88329	0.054935
H0G2.17	H7Sh1.17	0.840724			U0G2.17	U7Sh1.17	0.936719					Seed & stem of 14-day-old seedling	0.907245	0.030548
H0G3.17	H7Sh1.17	0.888829			U0G3.17	U7Sh1.17	0.905133					Seed & root of 14-day-old seedling	0.876409	0.03787
H0G1.17	H7Sh2.17	0.910552			U0G1.17	U7Sh2.17	0.877802				Unhulled	Seed & 1-day-old germinating seed	0.74471	0.0675896
H0G2.17	H7Sh2.17	0.910495			U0G2.17	U7Sh2.17	0.91681					Seed & 4-day-old germinating seed	0.73876	0.086595
H0G3.17	H7Sh2.17	0.928321			U0G3.17	U7Sh2.17	0.876028					Seed & shoot of 7-day-old seedling	0.925582	0.0595631
H0G1.17	H7Sh3.17	0.846405			U0G1.17	U7R1.17	0.674009	Seed & root of 7-day-old seedling				Seed & root of 7-day-old seedling	0.855565	0.0222284
H0G2.17	H7Sh3.17	0.77622			U0G2.17	U7R1.17	0.684784					Seed & leaf of 14-day-old seedling	0.883849	0.172432
H0G3.17	H7Sh3.17	0.8283			U0G3.17	U7R1.17	0.639281					Seed & stem of 14-day-old seedling	0.828232	0.14419
H0G1.17	H7R1.17	0.817036	Seed & root of 7-day-old seedling		U0G1.17	U7R2.17	0.719367					Seed & root of 14-day-old seedling	0.95628	0.0655998
H0G2.17	H7R1.17	0.766608			U0G2.17	U7R2.17	0.750526
H0G3.17	H7R1.17	0.839136			U0G3.17	U7R2.17	0.696542
H0G1.17	H7R2.17	0.809061			U0G1.17	U14L1.17	0.843388	Seed & leaf of 14-day-old seedling
H0G2.17	H7R2.17	0.769882			U0G2.17	U14L1.17	0.813663
H0G3.17	H7R2.17	0.810226			U0G3.17	U14L1.17	0.850266
H0G1.17	H7R3.17	0.840145			U0G1.17	U14L2.17	0.87288
H0G2.17	H7R3.17	0.793231			U0G2.17	U14L2.17	0.875954
H0G3.17	H7R3.17	0.837994			U0G3.17	U14L2.17	0.890726
H0G1.17	H14L1.17	0.939621	Seed & leaf of 14-day-old seedling		U0G1.17	U14L3.17	0.852136
H0G2.17	H14L1.17	0.926302			U0G2.17	U14L3.17	0.851577
H0G3.17	H14L1.17	0.909903			U0G3.17	U14L3.17	0.857696
H0G1.17	H14L2.17	0.882815			U0G1.17	U14S1.17	0.814986	Seed & stem of 14-day-old seedling
H0G2.17	H14L2.17	0.84373			U0G2.17	U14S1.17	0.831199
H0G3.17	H14L2.17	0.898635			U0G3.17	U14S1.17	0.814278
H0G1.17	H14L3.17	0.909042			U0G1.17	U14S2.17	0.720252
H0G2.17	H14L3.17	0.910495			U0G2.17	U14S2.17	0.703087
H0G3.17	H14L3.17	0.872803			U0G3.17	U14S2.17	0.697699
H0G1.17	H14S1.17	0.933038	Seed & stem of 14-day-old seedling		U0G1.17	U14S3.17	0.757092
H0G2.17	H14S1.17	0.913025			U0G2.17	U14S3.17	0.755104
H0G3.17	H14S1.17	0.962753			U0G3.17	U14S3.17	0.773252
H0G1.17	H14S2.17	0.900358			U0G1.17	U14R1.17	0.793453	Seed & root of 14-day-old seedling
H0G2.17	H14S2.17	0.866711			U0G2.17	U14R1.17	0.777799
H0G3.17	H14S2.17	0.913945			U0G3.17	U14R1.17	0.776834
H0G1.17	H14S3.17	0.906139			U0G1.17	U14R2.17	0.710997
H0G2.17	H14S3.17	0.908655			U0G2.17	U14R2.17	0.706475
H0G3.17	H14S3.17	0.927238			U0G3.17	U14R2.17	0.711318
H0G1.17	H14R1.17	0.723624	Seed & root of 14-day-old seedling		U0G1.17	U14R3.17	0.671289
H0G2.17	H14R1.17	0.693697			U0G2.17	U14R3.17	0.642493
H0G3.17	H14R1.17	0.707722			U0G3.17	U14R3.17	0.680724
H0G1.17	H14R2.17	0.73843
H0G2.17	H14R2.17	0.720164
H0G3.17	H14R2.17	0.763304
H0G1.17	H14R3.17	0.741684
H0G2.17	H14R3.17	0.758842
H0G3.17	H14R3.17	0.769153
Fungi
Hulled					Unhulled
Var1	Var2	Jaccard distance	Comparison		Var1	Var2	Jaccard distance	Comparison
H0G1.17	H1G1.17	0.837975	Seed & 1-day-old germinating seed		U0G1.17	U1G1.17	0.776923	Seed & 1-day-old germinating seed
H0G2.17	H1G1.17	0.834693			U0G2.17	U1G1.17	0.710358
H0G3.17	H1G1.17	0.855009			U0G3.17	U1G1.17	0.74826
H0G1.17	H1G2.17	0.890259			U0G1.17	U1G2.17	0.823461
H0G2.17	H1G2.17	0.82574			U0G2.17	U1G2.17	0.720241
H0G3.17	H1G2.17	0.826984			U0G3.17	U1G2.17	0.798738
H0G1.17	H1G3.17	0.914708			U0G1.17	U1G3.17	0.775647
H0G2.17	H1G3.17	0.879767			U0G2.17	U1G3.17	0.591473
H0G3.17	H1G3.17	0.62277			U0G3.17	U1G3.17	0.757285
H0G1.17	H4G1.17	0.847181	Seed & 4-day-old germinating seed		U0G1.17	U4G1.17	0.876875	Seed & 4-day-old germinating seed
H0G2.17	H4G1.17	0.792349			U0G2.17	U4G1.17	0.661021
H0G3.17	H4G1.17	0.76402			U0G3.17	U4G1.17	0.767621
H0G1.17	H4G2.17	0.901812			U0G1.17	U4G2.17	0.791456
H0G2.17	H4G2.17	0.747145			U0G2.17	U4G2.17	0.606109
H0G3.17	H4G2.17	0.69541			U0G3.17	U4G2.17	0.671033
H0G1.17	H4G3.17	0.8164			U0G1.17	U4G3.17	0.830978
H0G2.17	H4G3.17	0.890713			U0G2.17	U4G3.17	0.720663
H0G3.17	H4G3.17	0.897223			U0G3.17	U4G3.17	0.723086
H0G1.17	H7Sh1.17	0.896119	Seed & shoot of 7-day-old seedling		U0G1.17	U7Sh1.17	0.949736	Seed & shoot of 7-day-old seedling
H0G2.17	H7Sh1.17	0.923128			U0G2.17	U7Sh1.17	0.848806
H0G3.17	H7Sh1.17	0.933884			U0G3.17	U7Sh1.17	0.857413
H0G1.17	H7Sh2.17	0.949226			U0G1.17	U7Sh2.17	0.949236
H0G2.17	H7Sh2.17	0.936109			U0G2.17	U7Sh2.17	0.948302
H0G3.17	H7Sh2.17	0.941418			U0G3.17	U7Sh2.17	1
H0G1.17	H7Sh3.17	0.892193			U0G1.17	U7R1.17	0.861419	Seed & root of 7-day-old seedling
H0G2.17	H7Sh3.17	0.919509			U0G2.17	U7R1.17	0.811711
H0G3.17	H7Sh3.17	0.931078			U0G3.17	U7R1.17	0.85481
H0G1.17	H7R1.17	0.860323	Seed & root of 7-day-old seedling		U0G1.17	U7R2.17	0.866584
H0G2.17	H7R1.17	0.938125			U0G2.17	U7R2.17	0.871223
H0G3.17	H7R1.17	0.883175			U0G3.17	U7R2.17	0.867644
H0G1.17	H7R2.17	0.884842			U0G1.17	U14L1.17	0.582944	Seed & leaf of 14-day-old seedling
H0G2.17	H7R2.17	0.844399			U0G2.17	U14L1.17	0.776353
H0G3.17	H7R2.17	0.804577			U0G3.17	U14L1.17	0.634185
H0G1.17	H7R3.17	0.878764			U0G1.17	U14L2.17	1
H0G2.17	H7R3.17	0.852488			U0G2.17	U14L2.17	0.96116
H0G3.17	H7R3.17	0.859072			U0G3.17	U14L2.17	1
H0G1.17	H14L1.17	0.881749	Seed & leaf of 14-day-old seedling		U0G1.17	U14L3.17	1
H0G2.17	H14L1.17	0.92976			U0G2.17	U14L3.17	1
H0G3.17	H14L1.17	0.782347			U0G3.17	U14L3.17	1
H0G1.17	H14L2.17	0.938119			U0G1.17	U14S1.17	0.887734	Seed & stem of 14-day-old seedling
H0G2.17	H14L2.17	0.924412			U0G2.17	U14S1.17	0.885607
H0G3.17	H14L2.17	0.934886			U0G3.17	U14S1.17	0.881673
H0G1.17	H14L3.17	0.883915			U0G1.17	U14S2.17	0.957078
H0G2.17	H14L3.17	0.827596			U0G2.17	U14S2.17	0.956272
H0G3.17	H14L3.17	0.846823			U0G3.17	U14S2.17	0.95478
H0G1.17	H14S1.17	0.892119	Seed & stem of 14-day-old seedling		U0G1.17	U14S3.17	0.594311
H0G2.17	H14S1.17	0.92901			U0G2.17	U14S3.17	0.698009
H0G3.17	H14S1.17	0.865407			U0G3.17	U14S3.17	0.638624
H0G1.17	H14S2.17	0.931404			U0G1.17	U14R1.17	1	Seed & root of 14-day-old seedling
H0G2.17	H14S2.17	0.913603			U0G2.17	U14R1.17	1
H0G3.17	H14S2.17	0.926551			U0G3.17	U14R1.17	1
H0G1.17	H14S3.17	0.935297			U0G1.17	U14R2.17	0.871667
H0G2.17	H14S3.17	0.91995			U0G2.17	U14R2.17	0.869458
H0G3.17	H14S3.17	0.851861			U0G3.17	U14R2.17	0.865392
H0G1.17	H14R1.17	0.91808	Seed & root of 14-day-old seedling		U0G1.17	U14R3.17	1
H0G2.17	H14R1.17	0.853348			U0G2.17	U14R3.17	1
H0G3.17	H14R1.17	0.909812			U0G3.17	U14R3.17	1
H0G1.17	H14R2.17	0.920515
H0G2.17	H14R2.17	0.854723
H0G3.17	H14R2.17	0.802449
H0G1.17	H14R3.17	0.866311
H0G2.17	H14R3.17	0.875977
H0G3.17	H14R3.17	0.886465

## Sheet: Bacteria
Hulled condition						Unhulled condition
Comparison	Z	P.unadj	P.adj*			Comparison	Z	P.unadj	P.adj*
G0-G1 / G0-G4	-2.07024	0.0384302	0.0672528			G0-G1 / G0-G4	-0.525418	0.599293	0.629258
G0-G1 / G0-L14	-4.79626	1.62e-06	1.7e-05			G0-G1 / G0-L14	-4.98437	6.22e-07	6.53e-06
G0-G4 / G0-L14	-2.72603	0.0064102	0.0149571			G0-G4 / G0-L14	-4.45895	8.24e-06	4.32e-05
G0-G1 / G0-R14	-0.630072	0.528647	0.584295			G0-G1 / G0-R14	-2.69809	0.00697384	0.0162723
G0-G4G0-R14	1.44016	0.149821	0.19664			G0-G4 / G0-R14	-2.17267	0.0298049	0.0481464
G0-L14 / G0-R14	4.16619	3.1e-05	0.000162609			G0-L14 / G0-R14	2.28628	0.0222381	0.0424545
G0-G1 / G0-R7	-2.32741	0.0199435	0.038074			G0-G1 / G0-R7	-1.956	0.0504653	0.0756979
G0-G4 / G0-R7	-0.257172	0.797046	0.797046			G0-G4 / G0-R7	-1.48605	0.137266	0.180161
G0-L14 / G0-R7	2.46885	0.0135547	0.0284648			G0-L14 / G0-R7	2.50215	0.012344	0.0259224
G0-R14 / G0-R7	-1.69734	0.089633	0.125486			G0-R14 / G0-R7	0.457247	0.647494	0.647494
G0-G1 / G0-Sh7	-4.08904	4.33e-05	0.000181929			G0-G1 / G0-Sh7	-5.29009	1.22e-07	2.57e-06
G0-G4 / G0-Sh7	-2.0188	0.0435078	0.0702818			G0-G4 / G0-Sh7	-4.82014	1.43e-06	1e-05
G0-L14 / G0-Sh7	0.707224	0.479427	0.559332			G0-L14 / G0-Sh7	-0.831935	0.405446	0.47302
G0-R14 / G0-Sh7	-3.45897	0.000542252	0.00189788			G0-R14 / G0-Sh7	-2.87684	0.00401676	0.010544
G0-R7 / G0-Sh7	-1.76163	0.0781318	0.117198			G0-R7 / G0-Sh7	-3.04359	0.00233771	0.00818198
G0-G1 / G0-S14	-5.25917	1.45e-07	3.04e-06			G0-G1 / G0-S14	-3.47912	0.000503069	0.00211289
G0-G4 / G0-S14	-3.18894	0.00142797	0.00428393			G0-G4 / G0-S14	-2.9537	0.0031399	0.00941969
G0-L14 / G0-S14	-0.46291	0.643429	0.6756			G0-L14 / G0-S14	1.50525	0.13226	0.185164
G0-R14 / G0-S14	-4.6291	3.67e-06	2.57e-05			G0-R14 / G0-S14	-0.781026	0.434787	0.480554
G0-R7 / G0-S14	-2.93176	0.00337043	0.00884738			G0-R7 / G0-S14	-1.15582	0.247756	0.306051
G0-Sh7 / G0-S14	-1.17013	0.241947	0.298876			G0-Sh7 / G0-S14	2.17827	0.0293858	0.0514252
* P-values are adjusted with Benjamini-Hochberg Procedure.
Comparisons which adjusted P-values (P.adj) are under 0.05 are colored by green.
G0, seed microbial communities before planting; G1, seed microbial communities in 1 day after planting; G4, seed microbial communities in 4 days after planting;
Sh7, microbial communities of shoot endosphere in 7 days after planting; R7, microbial communities of root endosphere in 7 days after planting;
L14, microbial communities of leaf endosphere in 14 days after planting; S14, microbial communities of stem endosphere in 14 days after planting; R14, microbial communities of root endosphere in 14 days after planting.

## Sheet: Fungi
Hulled condition						Unhulled condition
Comparison	Z	P.unadj	P.adj*			Comparison	Z	P.unadj	P.adj*
G0-G1 / G0-G4	0.270031	0.787137	0.787137			G0-G1 / G0-G4	-0.0998672	0.92045	0.966472
G0-G1 / G0-L14	-1.74877	0.0803306	0.168694			G0-G1 / G0-L14	-2.77488	0.00552216	0.0386551
G0-G4 / G0-L14	-2.0188	0.0435078	0.130523			G0-G4 / G0-L14	-2.67502	0.00747258	0.039231
G0-G1 / G0-R14	-1.17013	0.241947	0.390838			G0-G1 / G0-R14	-3.88056	0.000104218	0.00218858
G0-G4 / G0-R14	-1.44016	0.149821	0.262186			G0-G4 / G0-R14	-3.78069	0.000156395	0.00164215
G0-L14 / G0-R14	0.578638	0.562834	0.622079			G0-L14 / G0-R14	-1.10567	0.268868	0.434325
G0-G1 / G0-R7	-0.810093	0.417887	0.487535			G0-G1 / G0-R7	-1.56955	0.11652	0.222447
G0-G4 / G0-R7	-1.08012	0.280087	0.420131			G0-G4 / G0-R7	-1.48023	0.138813	0.242923
G0-L14 / G0-R7	0.938679	0.347896	0.456613			G0-L14 / G0-R7	0.912381	0.361568	0.446643
G0-R14 / G0-R7	0.360041	0.718816	0.754757			G0-R14 / G0-R7	1.90132	0.0572595	0.150306
G0-G1 / G0-Sh7	-3.69042	0.000223883	0.00235077			G0-G1 / G0-Sh7	-2.59359	0.00949809	0.039892
G0-G4 / G0-Sh7	-3.96045	7.48e-05	0.00157096			G0-G4 / G0-Sh7	-2.50426	0.0122707	0.0429475
G0-L14 / G0-Sh7	-1.94165	0.0521794	0.136971			G0-L14 / G0-Sh7	-0.111655	0.911097	1
G0-R14 / G0-Sh7	-2.52029	0.0117259	0.0410406			G0-R14 / G0-Sh7	0.877289	0.38033	0.443718
G0-R7 / G0-Sh7	-2.88033	0.0039726	0.0208562			G0-R7 / G0-Sh7	-0.934812	0.349885	0.459224
G0-G1 / G0-S14	-2.66173	0.00777396	0.0326506			G0-G1 / G0-S14	-1.79761	0.0722388	0.168557
G0-G4 / G0-S14	-2.93176	0.00337043	0.023593			G0-G4 / G0-S14	-1.69774	0.0895562	0.188068
G0-L14 / G0-S14	-0.912961	0.361263	0.446266			G0-L14 / G0-S14	0.977272	0.328434	0.459808
G0-R14 / G0-S14	-1.4916	0.135804	0.259263			G0-R14 / G0-S14	2.08295	0.0372562	0.111769
G0-R7 / G0-S14	-1.85164	0.0640775	0.149514			G0-R7 / G0-S14	-0.0382817	0.969463	0.969463
G0-Sh7 / G0-S14	1.02869	0.303626	0.425076			G0-Sh7 / G0-S14	0.985754	0.324254	0.486381
* P-values are adjusted with Benjamini-Hochberg Procedure.
Comparisons which adjusted P-values (P.adj) are under 0.05 are colored by green.
G0, seed microbial communities before planting; G1, seed microbial communities in 1 day after planting; G4, seed microbial communities in 4 days after planting;
Sh7, microbial communities of shoot endosphere in 7 days after planting; R7, microbial communities of root endosphere in 7 days after planting;
L14, microbial communities of leaf endosphere in 14 days after planting; S14, microbial communities of stem endosphere in 14 days after planting; R14, microbial communities of root endosphere in 14 days after planting.
